# Supplementary material
Source: PubMed Central journal article supplement (PMC385417)
Supplement: jcinvest_113_8_1093__1.pdf [file jcinvest_113_8_1093__1.pdf]

### Supplementary References

- S1. Steere, A.C., Malawista, S.E., Snyderman, D.R., Shope, R.E., Andiman, W.A., Ross, M.R., and Steele, F.M. 1977. Lyme arthritis: an epidemic of oligoarticular arthritis in children and adults in three Connecticut communities. *Arthritis Rheum.* **20**:7-17.
- S2. Herxheimer, K., and Hartmann, K. 1902. Ueber Acrodermatitis chronica atrophicans. *Arch. Derm.* **61**:57-76,255-300.
- S3. Afzelius, A. 1921. Erythema chronicum migrans. *Acta Derm. Venereol.* **2**:120-125.
- S4. Bannwarth, A. 1944. Zur Klinik und Pathogenese der "chronischen lymphocytaren Meningitis". *Arch. Psychiatr. Nervenkrankh.* **117**:161-185.
- S5. Scrimanti, R.J. 1970. Erythema chronicum migrans. *Arch. Derm.* **102**:104-105.
- S6. Mast, W.E., and Burrows, W.M.J. 1976. Erythema chronicum migrans in the United States. *J. Amer. Med. Assoc.* **236**:859-860.
- S7. Burgdorfer, W., Barbour, A.G., Hayes, S.F., Benach, J.L., Grunwaldt, E., and Davis, J.P. 1982. Lyme disease -- a tick-borne spirochetosis? *Science* **216**:1317-1319.
- S8. Steere, A.C., Grodzicki, R.L., Kornblatt, A.N., Craft, J.E., Barbour, A.G., Burgdorfer, W., Schmid, G.P., Johnson, E., and Malawista, S.E. 1983. The spirochetal etiology of Lyme disease. *N. Engl. J. Med.* **308**:733-740.
- S9. Benach, J.L., Bosler, E.M., Hanrahan, J.P., Coleman, J.L., Habicht, G.S., Bast, T.F., Cameron, D.J., Ziegler, J.L., Barbour, A.G., Burgdorfer, W., et al. 1983. Spirochetes isolated from the blood of two patients with Lyme disease. *N. Engl. J. Med.* **308**:740-742.
- S10. Johnson, R.C., Schmid, G.P., Hyde, F.W., Steigerwalt, A.G., and Brenner, D.J. 1984. *Borrelia burgdorferi* sp. nov.: etiologic agent of Lyme disease. *Int. J. Syst. Bacteriol.* **34**:496-497.
- S11. Baranton, G., Postic, D., Saint-Girons, I., Boerlin, P., Piffaretti, J.C., Assous, M., and Grimont, P.A. 1992. Delineation of *Borrelia burgdorferi sensu stricto*, *Borrelia garinii* sp. nov., and group VS461 associated with Lyme borreliosis. *Int. J. Syst. Bacteriol.* **42**:378-383.
- S12. Canica, M.M., Nato, F., Du Merle, L., Mazie, J.C., Baranton, G., and Postic, D. 1993. Monoclonal antibodies for identification of *Borrelia afzelii* sp. nov. associated with late cutaneous manifestations of Lyme borreliosis. *Scand. J. Infect. Dis.* **25**:441-448.
- S13. Bono, J.L., Elias, A.F., Kupko, J.J., III, Stevenson, B., Tilly, K., and Rosa, P.

2000. Efficient targeted mutagenesis in *Borrelia burgdorferi*. *Journal of Bacteriology* **182**:2445-2452.

S14. Sartakova, M., Dobrikova, E., and Cabello, F.C. 2000. Development of an extrachromosomal cloning vector system for use in *Borrelia burgdorferi*. *Proc. Natl. Acad. Sci. USA* **97**:4850-4855.

S15. Hubner, A., Yang, X., Nolen, D.M., Popova, T.G., Cabello, F.C., and Norgard, M.V. 2001. Expression of *Borrelia burgdorferi* OspC and DbpA is controlled by a RpoN-RpoS regulatory pathway. *Proc. Natl. Acad. Sci. USA* **98**:12724-12729.

S16. Lawrenz, M.B., Kawabata, H., Purser, J.E., and Norris, S.J. 2002. Decreased electroporation efficiency in *Borrelia burgdorferi* containing linear plasmids lp25 and lp56: impact on transformation of infectious *B. burgdorferi*. *Infect. Immun.* **70**:4798-4804.

S17. Purser, J.E., Lawrenz, M.B., Caimano, M.J., Howell, J.K., Radolf, J.D., and Norris, S.J. 2003. A plasmid-encoded nicotinamidase (PncA) is essential for infectivity of *Borrelia burgdorferi* in a mammalian host. *Mol. Microbiol.* **48**:753-764.

S18. Carroll, J.A., Stewart, P.E., Rosa, P., Elias, A.F., and Garon, C.F. 2003. An enhanced GFP reporter system to monitor gene expression in *Borrelia burgdorferi*. *Microbiology* **149**:1819-1828.

S19. Kawabata, H., Masuzawa, T., and Yanagihara, Y. 1993. Genomic analysis of *Borrelia japonica* sp.nov. isolated from *Ixodes ovatus* in Japan. *Microbiol. Immunol.* **37**:843-848.

S20. Marconi, R.T., Liveris, D., and Schwartz, I. 1995. Identification of novel insertion elements, restriction fragment length polymorphism patterns, and discontinuous 23S rRNA in Lyme disease spirochetes: phylogenetic analyses of rRNA genes and their intergenic spacers in *Borrelia japonica* sp. nov. and genomic group 21038 (*Borrelia andersonii* sp.nov.) isolates. *J. Clin. Microbiol.* **33**:2427-2434.

S21. Fukunaga, M., Hamase, A., Okada, K., and Nakao, M. 1996. *Borrelia tanukii* sp. nov. and *Borrelia turdae* sp. nov. found from ixodid ticks in Japan: rapid species identification by 16S rRNA gene-targeted PCR analysis. *Microbiol. Immunol.* **40**:877-881.

S22. Wang, G., van Dam, A.P., Le Fleche, A., Postic, D., Peter, O., Baranton, G., de Boer, R., Spanjaard, L., and Dankert, J. 1997. Genetic and phenotypic analysis of *Borrelia valaisiana* sp. nov. (*Borrelia* genomic groups VS116 and M19). *Int. J. Syst. Bacteriol.* **47**:926-932.

S23. Le Fleche, A., Postic, D., Girardet, K., Peter, O., and Baranton, G. 1997.

Characterization of *Borrelia lusitaniae* sp. nov. by 16S ribosomal DNA sequence analysis. *Int. J. Syst. Bacteriol.* **47**:921-925.

S24. Postic, D., Ras, N.M., Lane, R.S., Hendson, M., and Baranton, G. 1998. Expanded diversity among California borrelia isolates and description of *Borrelia bissetti* sp. nov. (formerly *Borrelia* group DN127). *J. Clin. Microbiol.* **36**:3497-3504.

S25. Masuzawa, T., Takada, N., Kudeken, M., Fukui, T., Yano, Y., Ishiguro, F., Kawamura, Y., Imai, Y., and Ezaki, T. 2001. *Borrelia sinica* sp. nov., a Lyme disease-related *Borrelia* species isolated in China. *Int. J. Syst. Evol. Microbiol.* **51**:1817-1824.

S26. Lane, R.S., Piesman, J., and Burgdorfer, W. 1991. Lyme borreliosis: relation of its causative agent to its vectors and hosts in North America and Europe. *Ann. Rev. Immunol.* **36**:587-609.

S27. Levine, J.F., Wilson, M.L., and Spielman, A. 1985. Mice as reservoirs of the Lyme disease spirochete. *Am. J. Trop. Med. Hyg.* **34**:355-360.

S28. Wilson, M.L., Adler, G.H., and Spielman, A. 1985. Correlation between abundance of deer and that of the deer tick, *Ixodes dammini* (Acari: Ixodidae). *Ann. Entomol. Soc. Am.* **78**:172-176.

S29. Brown, R.N., and Lane, R.S. 1992. Lyme disease in California: A novel enzootic transmission cycle of *Borrelia burgdorferi*. *Science* **256**:1439-1442.

S30. Steere, A.C., Taylor, E., Wilson, M.L., Levine, J.F., and Spielman, A. 1986. A longitudinal assessment of the clinical and epidemiological features of Lyme disease in a defined population. *J. Infect. Dis.* **154**:295-300.

S31. Marshall, W.F., 3rd, Telford, S.R., 3rd, Rys, P.N., Rutledge, B.J., Mathiesen, D., Malawista, S.E., Spielman, A., and Persing, D.H. 1994. Detection of *Borrelia burgdorferi* DNA in museum specimens of *Peromyscus leucopus*. *J. Infect. Dis.* **170**:1027-1032.

S32. Hanrahan, J.P., Benach, J.L., Coleman, J.L., Bosler, E.M., Morse, D.L., Cameron, D.J., Edelman, R., and Kaslow, R.A. 1984. Incidence and cumulative frequency of endemic Lyme disease in a community. *J. Infect. Dis.* **150**:489-496.

S33. Lastavica, C.C., Wilson, M.L., Berardi, V.P., Spielman, A., and Deblinger, R.D. 1989. Rapid emergence of a focal epidemic of Lyme disease in coastal Massachusetts. *N. Engl. J. Med.* **320**:133-137.

S34. Steere, A.C. 1994. Lyme disease: A growing threat to urban populations. *Proc. Natl. Acad. Sci. USA* **91**:2378-2383.

S35. de Silva, A.M., and Fikrig, E. 1997. Arthropod- and host-specific gene

expression by *Borrelia burgdorferi*. *J. Clin. Invest.* **100**:S3-S5.

S36. Wormser, G.P., Bittker, S., Cooper, D., Nowakowski, J., Nadelman, R.B., and Pavia, C. 2000. Comparison of the yields of blood cultures using serum or plasma from patients with early Lyme disease. *J. Clin. Microbiol.* **38**:1648-1650.

S37. Karlsson, M., Hovind-Hougen, K., Svenungsson, B., and Stiernstedt, G. 1990. Cultivation and characterization of spirochetes from cerebrospinal fluid of patients with Lyme borreliosis. *J. Clin. Microbiol.* **28**:473-479.

S38. Kraiczy, P., Skerka, C., Zipfel, P.F., and Brade, V. 2002. Complement regulator-acquiring surface proteins of *Borrelia burgdorferi*: a new protein family involved in complement resistance. *Wiener Klinische Wochenschrift* **114**:568-573.

S39. Alitalo, A., Meri, T., Lankinen, H., Seppala, I., Lahdenne, P., Hefty, P.S., Akins, D., and Meri, S. 2002. Complement inhibitor factor H binding to Lyme disease spirochetes is mediated by inducible expression of multiple plasmid-encoded outer surface protein E paralogs. *J. Immunol.* **169**:3847-3853.

S40. Stevenson, B., El-Hage, N., Hines, M.A., Miller, J.C., and Babb, K. 2002. Differential binding of host complement inhibitor factor H by *Borrelia burgdorferi* Erp surface proteins: a possible mechanism underlying the expansive host range of Lyme disease spirochetes. *Infect. Immun.* **70**:491-497.

S41. McDowell, J.V., Wolfgang, J., Tran, E., Metts, M.S., Hamilton, D., and Marconi, R.T. 2003. Comprehensive analysis of the factor H binding capabilities of borrelia species associated with Lyme disease: delineation of two distinct classes of factor H binding proteins. *Infect. Immun.* **71**:3597-3602.

S42. Schoenfeld, R., Araneo, B., Ma, Y., Yang, L.M., and Weis, J.J. 1992. Demonstration of a B-lymphocyte mitogen produced by the Lyme disease pathogen, *Borrelia burgdorferi*. *Infect. Immun.* **60**:455-464.

S43. Fikrig, E., Barthold, S.W., Kantor, F.S., and Flavell, R.A. 1990. Protection of mice against the Lyme disease agent by immunizing with recombinant OspA. *Science* **250**:553-556.

S44. Nguyen, T.P., Lam, T.T., Barthold, S.W., Telford, S.R., 3rd, Flavell, R.A., and Fikrig, E. 1994. Partial destruction of *Borrelia burgdorferi* within ticks that engorged on OspE- or OspF-immunized mice. *Infect. Immun.* **62**:2079-2084.

S45. Kochi, S.K., and Johnson, R.C. 1988. Role of immunoglobulin G in killing *Borrelia burgdorferi* by the classical complement pathway. *Infect. Immun.* **56**:314-321.

S46. Oksi, J., Savolainen, J., Pene, J., Bousquet, J., Laippala, P., and Viljanen, M.K.

1996. Decreased interleukin-4 and increased gamma interferon production by peripheral blood mononuclear cells of patients with Lyme borreliosis. *Infect. Immun.* **64**:3620-3623.

S47. Gross, D.M., Steere, A.C., and Huber, B.T. 1998. T helper 1 response is dominant and localized to the synovial fluid in patients with Lyme arthritis. *J. Immunol.* **160**:1022-1028.

S48. Busch, D.H., Jassoy, C., Brinckmann, U., Girschick, H., and Huppertz, H.I. 1996. Detection of *Borrelia burgdorferi*-specific CD8+ T cytotoxic T cells in patients with Lyme arthritis. *J. Immunol.* **157**:3534.

S49. Vincent, M.S., Roessner, K., Lynch, D., Wilson, D., Cooper, S.M., Tschopp, J., Sigal, L.H., and Budd, R.C. 1996. Apoptosis of Fashigh CD4+ synovial T cells by borrelia-reactive Fas-ligand(high) gamma delta T cells in Lyme arthritis. *J. Experi. Med.* **184**:2109-2117.

S50. Glatzel, A., Entschladen, F., Zollner, T.M., Kraiczy, P., Brade, V., Kaufmann, R., Janssen, O., Lengel-Janssen, B., Wesch, D., and Kabelitz, D. 2002. The responsiveness of human V delta 1 gamma delta T cells to *Borrelia burgdorferi* is largely restricted to synovial-fluid cells from patients with Lyme arthritis. *J. Infect. Dis.* **186**:1043-1046.

S51. Asbrink, E., Brehmer-Anderson, E., and Hovmark, A. 1986. Acrodermatitis chronica atrophicans--a spirochetosis. *Am. J. Dermatopathol.* **8**:209-219.

S52. Ackermann, R., Rehse-Kupper, B., Gollmer, E., and Schmidt, R. 1988. Chronic neurologic manifestations of erythema migrans borreliosis. *Ann. NY Acad. Sci.* **539**:16-23.

S53. Halperin, J.J. 1998. Nervous system Lyme disease. *J. Neurol. Sci.* **153**:182-191.

S54. Limbach, F.X., Jaulhac, B., Puechal, X., Monteil, H., Kuntz, J.L., Piemont, Y., and Sibilia, J. 2001. Treatment resistant Lyme arthritis caused by *Borrelia garinii*. *Ann. Rheum. Dis.* **60**:284-286.

S55. Bradley, J.F., Johnson, R.C., and Goodman, J.L. 1994. The persistence of spirochetal nucleic acids in active Lyme arthritis. *Ann. Intern. Med.* **120**:487-489.

S56. Kalish, R.A., Leong, J.M., and Steere, A.C. 1993. Association of treatment resistant chronic Lyme arthritis with HLA-DR4 and antibody reactivity to OspA and OspB of *Borrelia burgdorferi*. *Infect. Immun.* **61**:2774-2779.

S57. Kalish, R.A., Leong, J.M., and Steere, A.C. 1995. Early and late antibody responses to full-length and truncated constructs of outer-surface protein A of *Borrelia burgdorferi* in Lyme disease. *Infect. Immun.* **63**:2228-2235.

S58. Lengel-Janssen, B., Strauss, A.F., Steere, A.C., and Kamradt, T. 1994. The T helper cell response in Lyme arthritis: differential recognition of *Borrelia burgdorferi* outer surface protein A (OspA) in patients with treatment-resistant or treatment-responsive Lyme arthritis. *J. Experi. Med.* **180**:2069-2078.

S59. Sigal, L.H. 1990. Summary of the first 100 patients seen at a Lyme disease referral center. *Am. J. Med.* **88**:577-581.

S60. Dinerman, H., and Steere, A.C. 1992. Lyme disease associated with fibromyalgia. *Ann. Intern. Med.* **117**:281-285.

S61. Asch, E.S., Bujak, D.I., Weiss, M., Peterson, M.G., and Weinstein, A. 1994. Lyme disease: an infectious and postinfectious syndrome. *J. Rheumatol.* **21**:454-461.

S62. Sigal, L.H., and Patella, S.J. 1992. Lyme arthritis as the incorrect diagnosis in pediatric and adolescent fibromyalgia. *Pediatrics* **90**:523-528.

S63. CDC. 1990. Case definitions for public health surveillance. *Morb. Mort. Wkly. Rpts.* **39**(RR-13):1-43.

S64. CDC. 1995. Recommendations for test performance and interpretation from the Second International Conference on serologic diagnosis of Lyme disease. *Morb. Mort. Wkly. Rpts.* **44**:590-591.

S65. Piesman, J. 1993. Dynamics of *Borrelia burgdorferi* transmission by nymphal *Ixodes dammini* ticks. *J. Infect. Dis.* **167**:1082-1085.

S66. Ohnishi, J., Piesman, J., and de Silva, A.M. 2001. Antigenic and genetic heterogeneity of *Borrelia burgdorferi* populations transmitted by ticks. *Proc. Natl. Acad. Sci. USA* **98**:670-675.

S67. Engstrom, S.M., Shoop, E., and Johnson, R.C. 1995. Immunoblot interpretation criteria for serodiagnosis of early Lyme disease. *J. Clin. Microbiol.* **33**:419-427.

S68. Dattwyler, R.J., Volkman, D.J., Conaty, S.M., Platkin, S.P., and Luft, B.J. 1990. Amoxicillin plus probenecid versus doxycycline for treatment of erythema migrans borreliosis. *Lancet* **336**:1404-1406.

S69. Krause, P.J., Lepore, T., Sikand, V.K., Gadbar, J., Jr., Burke, G., Telford, S.R., 3rd, Brassard, P., Pearl, D., Azlanzadeh, J., Christianson, D., et al. 2000. Atovaquone and azithromycin for the treatment of babesiosis. *N. Engl. J. Med.* **343**:1454-1458.

S70. Dattwyler, R.J., Halperin, J.J., Volkman, D.J., and Luft, B.J. 1988. Treatment of late Lyme borreliosis -- randomized comparison of ceftriaxone and penicillin. *Lancet* **1**:1191-1194.

S71. Eckman, M.H., Steere, A.C., Kalish, R.A., and Pauker, S.G. 1997. Cost effectiveness of oral as compared with intravenous antibiotic therapy for patients with early Lyme disease or Lyme arthritis. *N. Engl. J. Med.* **337**:357-363.

S72. Sigal, L.H., Zahradnik, J.M., Lavin, P., Patella, S.J., Bryant, G., Haselby, R., Hilton, E., Kunkel, M., Adler-Klein, D., Doherty, T., et al. 1998. A vaccine consisting of recombinant *Borrelia burgdorferi* outer-surface protein A to prevent Lyme disease. Recombinant outer-surface protein A Lyme disease vaccine study consortium [see comments] [published erratum appears in *N. Engl. J. Med.* 1998 Aug 20;339(8):571]. *N. Engl. J. Med.* **339**:216-222.

S73. Sikand, V.K., Halsey, N., Krause, P.J., Sood, S.K., Geller, R., Van Hoecke, C., Buscarino, C., and Parenti, D. 2001. Safety and immunogenicity of a recombinant *Borrelia burgdorferi* outer surface protein A vaccine against Lyme disease in healthy children and adolescents: A randomized controlled trial. *Pediatrics* **108**:123-128.

S74. Meltzer, M.I., Dennis, D.T., and Orloski, K.A. 1999. The cost effectiveness of vaccinating against Lyme disease. *Emerg. Infect. Dis.* **5**:321-328.

S75. Shadick, N.A., Liang, M.H., Phillips, C.B., Fossel, K., and Kuntz, K.M. 2001. The cost-effectiveness of vaccination against Lyme disease. *Arch. Intern. Med.* **161**:554-561.
